# Supplementary material for: Effects of Transcutaneous Electrical Nerve Stimulation on Pain and Chemotherapy-Induced Peripheral Neuropathy in Cancer Patients: A Systematic Review
Source: MDPI journal article supplement (doi:10.3390/medicina58020284), 2022-02-14
Supplement: s1 [file s1]

**Table S2.** Literature review search terms.

| Database       | Search terms                                                                                                                                                                                                                                                                                                                                                                                                                                                                                                                                                                                                                                                                                                                                                                                                                    |
|----------------|---------------------------------------------------------------------------------------------------------------------------------------------------------------------------------------------------------------------------------------------------------------------------------------------------------------------------------------------------------------------------------------------------------------------------------------------------------------------------------------------------------------------------------------------------------------------------------------------------------------------------------------------------------------------------------------------------------------------------------------------------------------------------------------------------------------------------------|
| MEDLINE/PubMed | <p>“Transcutaneous electrical nerve stimulation”[All Fields] OR<br/> (transcutaneous[All Fields] AND electrical[All Fields] AND nerve[All<br/> Fields] AND stimulation[All Fields]) OR electrostimulation[All Fields]<br/> OR TENS[All Fields]</p> <p>AND cancer[Title/Abstract] OR cancers[Title/Abstract] OR<br/> carcinoma[Title/Abstract] OR carcinomas[Title/Abstract] OR<br/> tumor[Title/Abstract] OR tumors[Title/Abstract] OR<br/> tumour[Title/Abstract] OR tumours[Title/Abstract] OR<br/> oncology[Title/Abstract] OR oncological[Title/Abstract] OR<br/> malignant[Title/Abstract] OR malignancy[Title/Abstract] OR<br/> malignancies[Title/Abstract] OR neoplasm[Title/Abstract]) OR<br/> neoplasms[Title/Abstract] OR neoplastic[Title/Abstract] AND<br/> pain[Title/Abstract] OR neuropathy[Title/Abstract]</p> |
| EMBASE*        | <p>1. exp Transcutaneous electrical nerve stimulation/<br/> 2. (transcutaneous and electrical and nerve and stimulation).mp.<br/> 3. electrostimulation.mp.<br/> 4. TENS.mp.<br/> 5. 1 or 2 or 3 or 4<br/> 6. (cancer* or carcinoma* or tumor* or tumour* or oncolog* or malignan*<br/> or neoplas* or carcinom*).ti,ab<br/> 7. pain*.ti,ab<br/> 8. neuropath*.ti,ab<br/> 9. 7 or 8<br/> 10. 5 and 6 and 9</p>                                                                                                                                                                                                                                                                                                                                                                                                                  |

\* For EMBASE (and accordingly for Cochrane Central Register of Controlled Trials) the search strategy was modified (e.g. “All Fields” were replaced by “.mp”)
